# Supplementary material for: First Report of Phodopus sungorus Papillomavirus Type 1 Infection in Roborovski Hamsters (Phodopus roborovskii)
Source: MDPI journal article supplement (doi:10.3390/v13050739), 2021-04-23
Supplement: s1 [file s1]

## SUPPLEMENTARY MATERIALS

**Tabel S1:** GenBank accession numbers of papillomavirus L1 genes and corresponding host cytochrome b nucleotide sequences, used in the phylogenetic analysis, sorted in the alphabetical order.

| PV type | GenBank accession no.<br>(of the L1 gene) | Host                                                   | GenBank accession no.<br>of the cytochrome b<br>region |
|---------|-------------------------------------------|--------------------------------------------------------|--------------------------------------------------------|
| AplaPV1 | MK620303                                  | <i>Anas platyrhynchos</i><br>(mallard)                 | EU755253                                               |
| AsPV1   | HQ625440                                  | <i>Anas rubripes</i><br>(American black duck)          | AF059088                                               |
| BgPV1   | JX174437                                  | <i>Apodemus sylvaticus</i><br>(wood mouse)             | AB033695                                               |
| BPV1    | X02346                                    | <i>Bison bonasus</i><br>(European bison)               | KP866277                                               |
| BPV2    | M20219                                    | <i>Bos grunniens</i><br>(yak)                          | AB542193                                               |
| BPV5    | AF457465                                  | <i>Bos Taurus</i><br>(cow)                             | D34635                                                 |
| BPV8    | DQ098913                                  | <i>Bubalus bubalis</i><br>(water buffalo)              | D88637                                                 |
| BPV13   | JQ798171                                  | <i>Canis lupus</i><br>(dog)                            | EU352854                                               |
| BPV14   | KP276343                                  | <i>Capra ibex</i><br>(Alpine ibex)                     | AF034735                                               |
| BPV25   | MG252779                                  | <i>Capreolus capreolus</i><br>(roe deer)               | KJ558325                                               |
| CcaPV1  | MT774140                                  | <i>Cervus elaphus</i><br>(red deer)                    | AB001612                                               |
| CPV20   | KT901797                                  | <i>Eptesicus isabellinus</i><br>(meridional serotine)  | EU786824                                               |
| EePV1   | FJ379293                                  | <i>Eptesicus serotinus</i><br>(serotine bat)           | MF038481                                               |
| EsPV1   | NC038518                                  | <i>Equus asinus</i><br>(common donkey)                 | FJ428527                                               |
| EsPV2   | KC858264                                  | <i>Equus burchellii</i><br>(plains zebra)              | JF718888                                               |
| EsPV3   | KC858265                                  | <i>Equus caballus</i><br>(horse)                       | D82932                                                 |
| FarcPV1 | MK620302                                  | <i>Erinaceus concolor</i><br>(white-breasted hedgehog) | KF783121                                               |
| HPV6    | HG793870                                  | <i>Erinaceus europaeus</i><br>(European hedgehog)      | KF783119                                               |

|         |          |
|---------|----------|
| HPV8    | M12737   |
| HPV16   | LC456627 |
| HPV18   | LC509006 |
| LsmiPV1 | MK620304 |
| LsmiPV2 | MK620330 |
| MaegPV1 | MH616908 |
| MaPV1   | HG530538 |
| MfPV3   | EF558839 |
| MfPV4   | EF558841 |
| MfPV5   | EF558843 |
| MfPV6   | EF558840 |
| MfPV7   | EF558838 |
| MfPV8   | EF558842 |
| MfPV9   | EU490516 |
| MfPV10  | EU490515 |
| MfPV11  | GQ227670 |
| MmiPV1  | DQ269468 |
| MmPV1   | M60184   |
| MmuPV1  | GU808564 |
| MnPV1   | U01834   |
| MscPV1  | JQ814848 |
| OaPV1   | U83594   |

|                                                          |          |
|----------------------------------------------------------|----------|
| <i>Felis catus</i><br>(cat)                              | AB004238 |
| <i>Fratercula arctica</i><br>(Atlantic puffin)           | DQ385228 |
| <i>Giraffa camelopardalis</i><br>(giraffe)               | LT628417 |
| <i>Hippotragus niger</i><br>(sable antelope)             | AF022061 |
| <i>Homo sapiens</i><br>(human)                           | U09500   |
| <i>Larus marinus</i><br>(great black-backed gull)        | AJ508140 |
| <i>Larus smithsonianus</i><br>(American herring gull)    | FM209896 |
| <i>Macaca fascicularis</i><br>(long-tailed macaque)      | AF295584 |
| <i>Macaca mulatta</i><br>(rhesus macaque)                | U38272   |
| <i>Mastomys natalensis</i><br>(Natal multimammate mouse) | AF518342 |
| <i>Melanogrammus aeglefinus</i><br>(haddock)             | DQ020497 |
| <i>Mesocricetus auratus</i><br>(Syrian hamster)          | KY754035 |
| <i>Micromys minutus</i><br>(harvest mouse)               | AB033697 |
| <i>Miniopterus schreibersii</i><br>(Schreibers's bat)    | EF530348 |
| <i>Mus musculus</i><br>(house mouse)                     | LC325158 |
| <i>Ovis aries</i><br>(sheep)                             | D84205   |
| <i>Ovis gmelini</i><br>(mouflons)                        | D84203   |
| <i>Pan paniscus</i><br>(pygmy chimpanzee)                | D38116   |
| <i>Pan troglodytes</i><br>(common chimpanzee)            | X93338   |
| <i>Papio hamadryas</i><br>(hamadryas baboon)             | AF295585 |
| <i>Peromyscus maniculatus</i><br>(deer mouse)            | MN124384 |
| <i>Phodopus roborovskii</i><br>(Roborovski hamster)      | GU797468 |

|                               |          |
|-------------------------------|----------|
| OaPV2                         | U83595   |
| OaPV4                         | KX954121 |
| PhPV1                         | JF304764 |
| PmPV1                         | NC039039 |
| PpPV1                         | X62844   |
| *PpPV1 <sup>Cc</sup>          | AF020905 |
| PsuPV1                        | HG939559 |
| <sup>a</sup> PsuPV1 (APV 475) | MW602287 |
| <sup>b</sup> PsuPV1 (APV 480) | MW602286 |
| <sup>c</sup> PsuPV1 (APV 516) | MW602285 |
| RaIPV1                        | KT626573 |
| RfPV1                         | NC038527 |
| RnPV1                         | GQ180114 |
| SsPV1                         | EF395818 |

\* PpPV1 isolated from a common chimpanzee.

<sup>a,b,c</sup> PsuPV1 isolates obtained in this study.

PV – papillomavirus; AplaPV – Anas platyrhynchos papillomavirus; AsPV – Apodemus sylvaticus papillomavirus; BgPV – Bos grunniens papillomavirus; BPV – Bos taurus papillomavirus; CcaPV – Capreolus capreolus papillomavirus; CPV – Canis familiaris papillomavirus; EePV – Erinaceus europaeus papillomavirus; EsPV – Eptesicus serotinus papillomavirus; FarcPV – Fratercula arctica papillomavirus; HPV – human papillomavirus; LsmiPV – Larus smithsonianus papillomavirus; MaegPV – Melanogrammus aeglefinus associated papillomavirus; MaPV – Mesocricetus auratus papillomavirus; MfPV – Macaca fascicularis papillomavirus; MmiPV – Micromys minutus papillomavirus; MmPV – Macaca mulata papillomavirus; MmuPV – Mus musculus papillomavirus; MnPV – Mastomys natalensis papillomavirus; MscPV – Miniopterus schreibersii papillomavirus; OaPV – Ovis aries papillomavirus; PhPV – Papio hamadryas papillomavirus; PmPV – Peromyscus papillomavirus; PpPV – Pan paniscus papillomavirus; PsuPV – Phodopus sungorus papillomavirus; RaIPV – Rusa alfredi papillomavirus; RfPV – Rhinolophus ferrumequinum papillomavirus; RnPV – Rattus norvegicus papillomavirus; SsPV – Sus scrofa papillomavirus.

|                                                             |          |
|-------------------------------------------------------------|----------|
| <i>Phodopus sungorus</i><br>(Siberian hamster)              | AF119266 |
| <i>Procyon lotor</i><br>(raccoon)                           | GU175439 |
| <i>Rattus norvegicus</i><br>(brown rat)                     | AB033713 |
| <i>Rhinolophus ferrumequinum</i><br>(greater horseshoe bat) | AB085731 |
| <i>Rupicapra rupicapra</i><br>(chamois)                     | AF034725 |
| <i>Rusa alfredi</i><br>(spotted deer)                       | JN632698 |
| <i>Sus domesticus</i><br>(pig)                              | AB015079 |
| <i>Tapirus bairdii</i><br>(tapir)                           | JF718880 |
